# Supplementary material for: Direct growth of three-dimensional nanoflower-like structures from flat metal surfaces
Source: Royal Society of Chemistry journal article supplement (doi:10.1039/d2cc04358k), 2022-01-01
Supplement: d2cc04358k1.pdf [file d2cc04358k1.pdf]

## Supporting Information

### Direct Growth of Three-Dimensional Nanoflower-like Structures from Flat Metal Surfaces

Jesse S. Dondapati <sup>a</sup>, Maduraiveeran Govindhan <sup>b</sup> and Aicheng Chen <sup>a\*</sup>

<sup>a</sup> Electrochemical Technology Centre, Department of Chemistry, University of Guelph, Guelph, ON N1G 2W1, Canada.

<sup>b</sup> Department of Chemistry, SRM Institute of Science and Technology, Kattankulathur 603 203, Tamil Nadu, India.

\* Corresponding author. E-mail: aicheng@uoguelph.ca

#### Experimental Section

**Materials:** Cobalt (Co) substrate (1.0 mm thickness, 99.95 purity), nitric acid (99.9%) were purchased from Sigma-Aldrich. All additional analytical grade reagents were of used as purchased. Pure water collected using a NANOpure<sup>®</sup> water system was employed in the preparation of all solutions. All electrochemical measurements were performed in 1.0 M KOH, as electrolyte solution.

**Fabrication of Co<sub>3</sub>O<sub>4</sub> nanoflowers:** Initially Co substrates (~0.63 cm<sup>2</sup>) were cleaned by sonication in acetone and then pure water. The Co<sub>3</sub>O<sub>4</sub> nanoflowers on Co substrates were fabricated by placing a cleaned Co substrate electrode in 3 mL of 1.5 M nitric acid solution for a period of 5 h, 10 h, 17 h and 25 h at 50 °C. A silicone oil bath was used to maintain constant temperature of 50 °C. The resulting Co substrates were washed with copious amount of NANOpure water at room temperature and dried at 60 °C for 1 h. Co<sub>3</sub>O<sub>4</sub> nanoflowers were formed on the etched Co substrate by annealing at 250 °C, 350 °C, 450 °C and 550 °C for 4 h in air with a ramp rate of 600 °C/h and allowed to cool down by nature.

**Characterization of nanomaterials:** The fabricated nanostructured Co<sub>3</sub>O<sub>4</sub> materials were characterized by using of various analytic techniques. The morphology and composition were characterized utilizing a field emission scanning electron microscope (FE-SEM) (Hitachi SU-70) equipped with the energy dispersive X-ray spectroscopy (EDX). The X-ray photoelectron spectra

were measured with a Thermo Fisher XPS system, where the size of the X-ray spot was 400  $\mu\text{m}$ , using an Al K $\alpha$  monochromatic source. Raman spectra were recorded using confocal micro-Raman spectroscopy with 514.5 nm laser excitation.

**Electrochemical measurements:** The electrochemical experiments were performed using of a Solartron SI 1287/1260 system employing a conventional one compartment three-electrode cell. A Co substrate ( $\sim 0.63 \text{ cm}^2$ ) was employed as the working electrode, whereas a silver/silver chloride electrode (Ag/AgCl) was utilized as the reference electrode, and a platinum coil was used as the counter electrode. All electrochemical experiments were measured at ambient room temperature ( $20 \pm 2 \text{ }^\circ\text{C}$ ). All measured electrochemical potentials in this work against the Ag/AgCl electrode were converted to the reversible hydrogen electrode (RHE) scale for comparison with literature values based on Nernst equation as follows:  $E_{\text{RHE}} = E_{\text{AgCl}} + 0.059(\text{pH}) + 0.197 \text{ V}$ . The results in the present study were not compensated for the internal resistance (iR). The onset potentials were calculated from the abscissa of intersection between the drawn tangents from non-faradaic and faradaic regions of LSV curve.

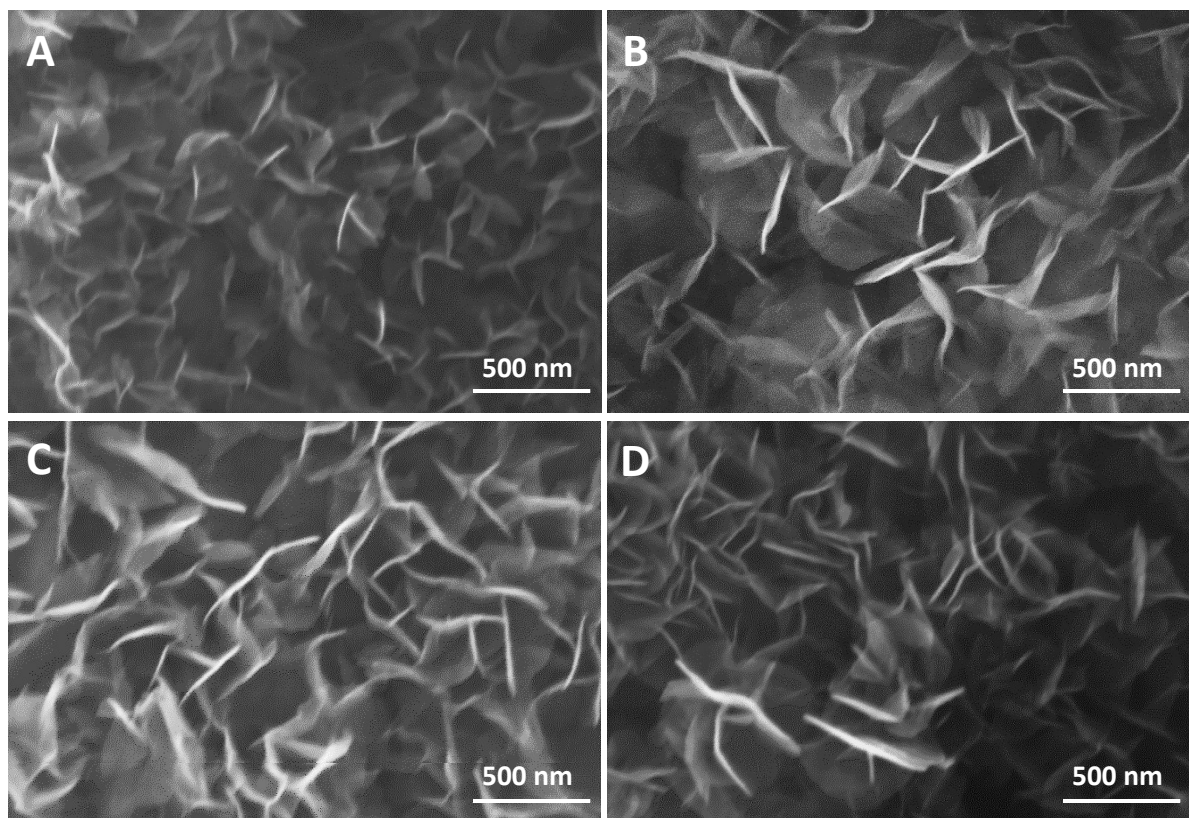

**Figure S1:** FE-SEM images of Co substrate treated in 1.5 M HNO<sub>3</sub> at 50 °C for 5 h (A), 10 h (B), 17 h (C) and 25 h (D) showing the transforming morphology of nanoleaves with etching time (before annealing).

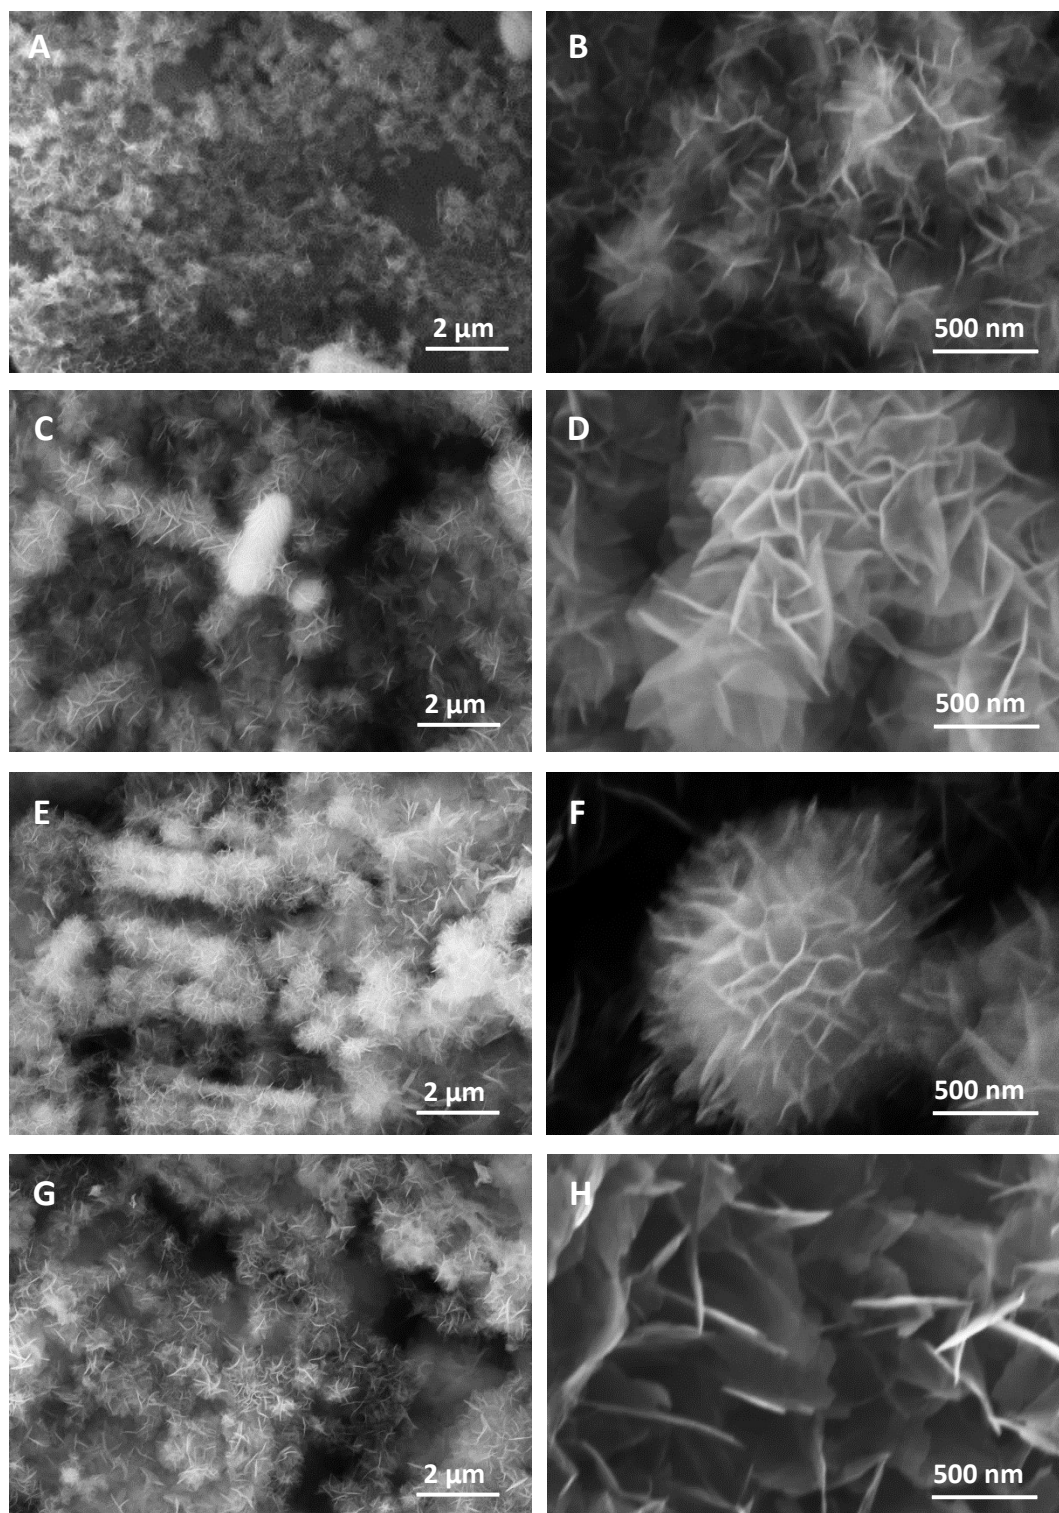

**Figure S2:** FE-SEM images of Co substrate treated in 1.5 M HNO<sub>3</sub> at 50 °C for 5 h (A & B), 10 h (C & D), 17 h (E & F) and 25 h (G & H) and annealed at 450 °C.

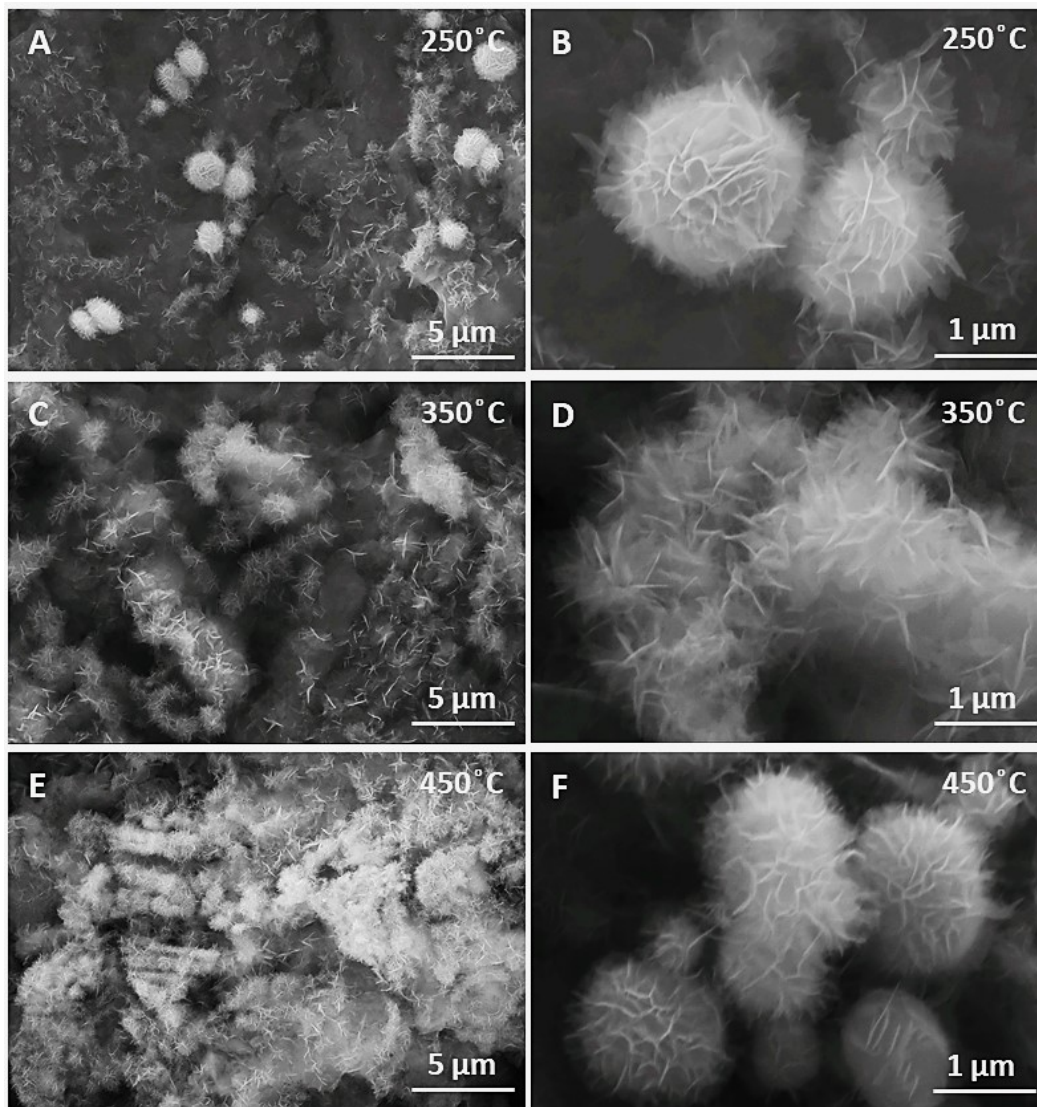

**Figure S3:** FE-SEM images of the  $\text{Co}_3\text{O}_4$  nanomaterials formed by etching Co substrates for 17 h and annealing at temperatures of 250  $^\circ\text{C}$  (A & B), 350  $^\circ\text{C}$  (C & D) and 450  $^\circ\text{C}$  (E & F).

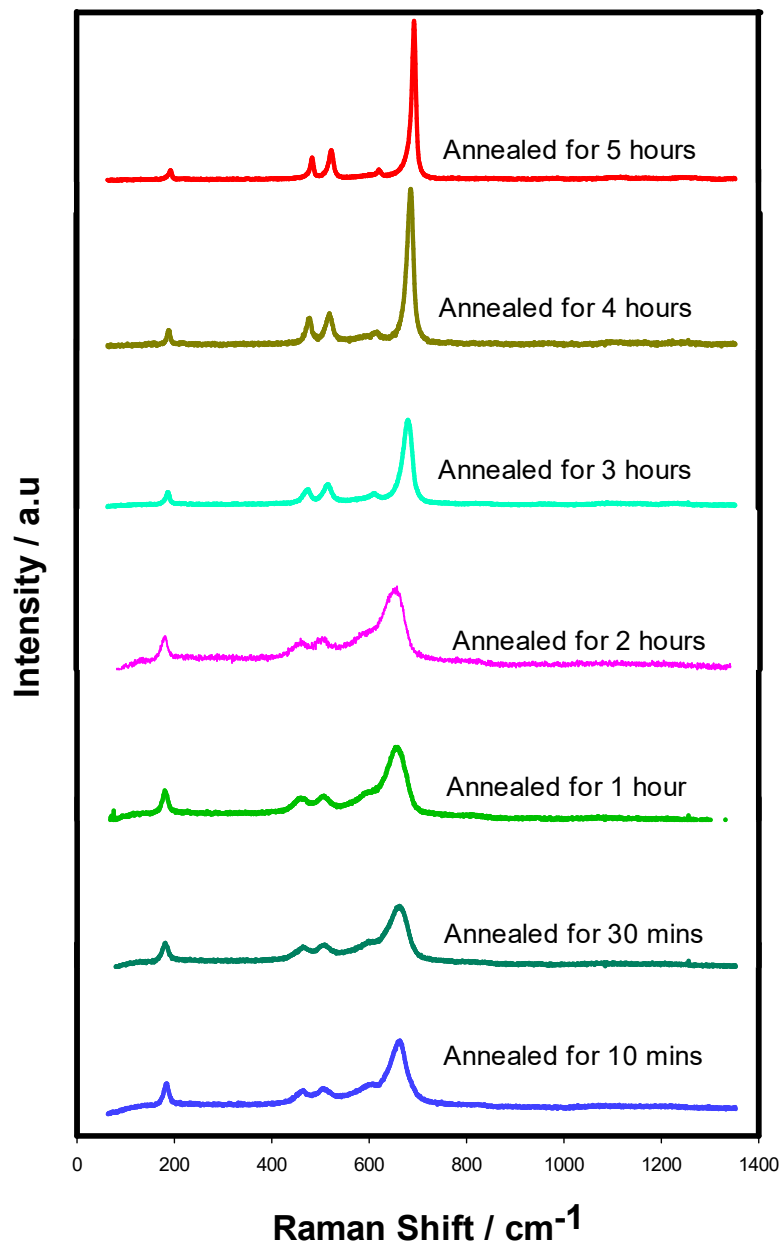

**Figure S4:** Raman spectra of Co plate sample that was etched for 17 hours and annealed from 10 mins to 5 hrs incrementally at 550 °C.

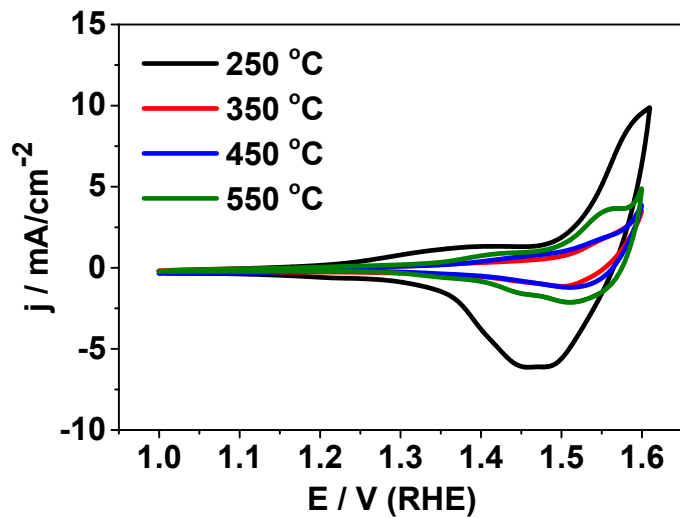

**Figure S5:** Cyclic voltammetry (CVs) of 17 hrs etched samples annealed at 250 °C, 350 °C, 450 °C and 550 °C recorded in 1 M KOH.

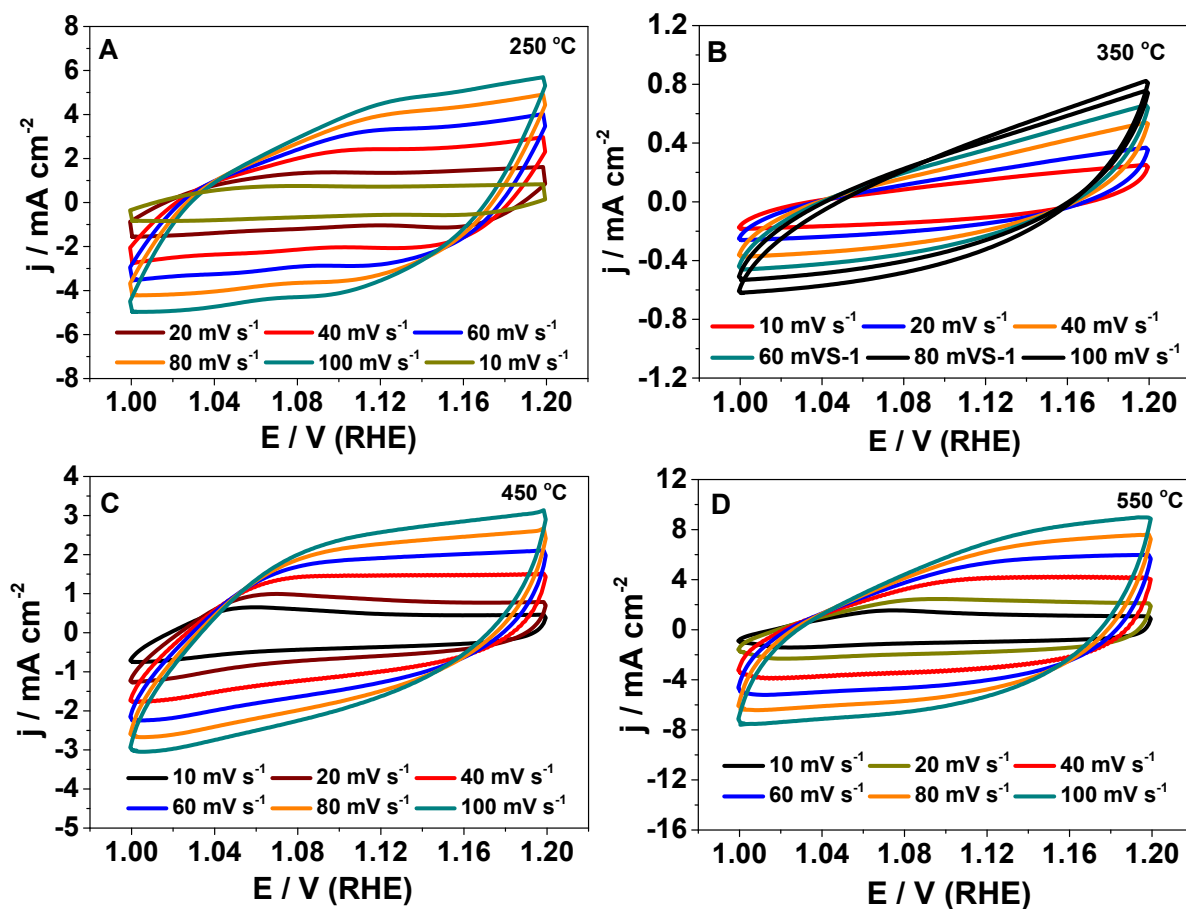

**Figure S6:** The electrochemical results of the formed Co<sub>3</sub>O<sub>4</sub> nanoflowers on the bulk electrode surface in 1.0 M KOH electrolyte showing cyclic voltammetry (CV) tests recorded at increasing scan rates for electrodes annealed at 250 °C (A), 350 °C (B), 450 °C (C), 550 °C (D).



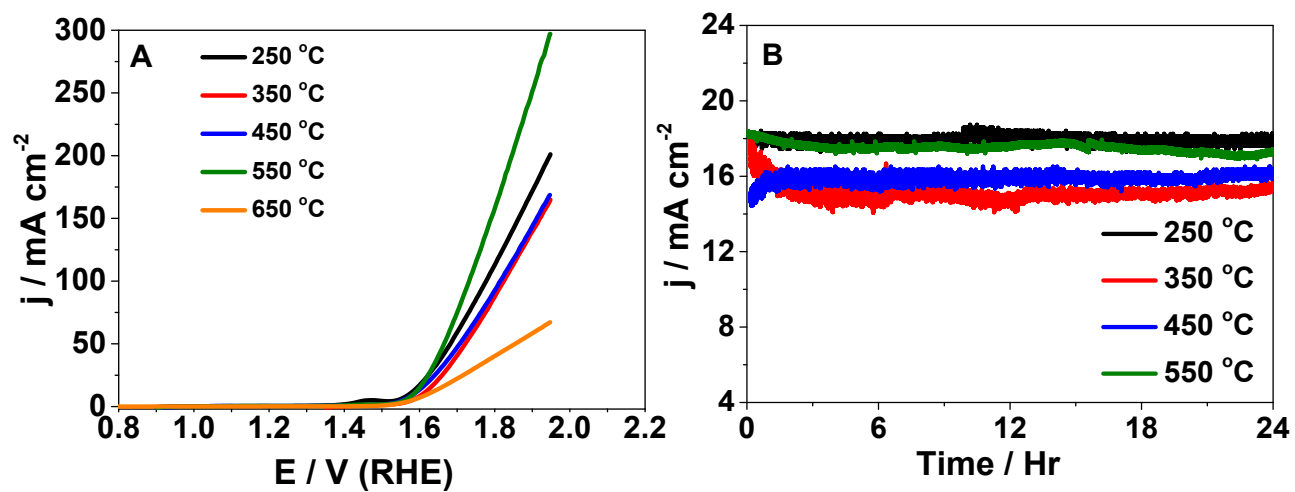

**Figure S7:** The linear sweep voltammetry (LSV) tests recorded at 5 mVs<sup>-1</sup> (A) and the stability tests recorded for 24 h at 1.61 V (B).

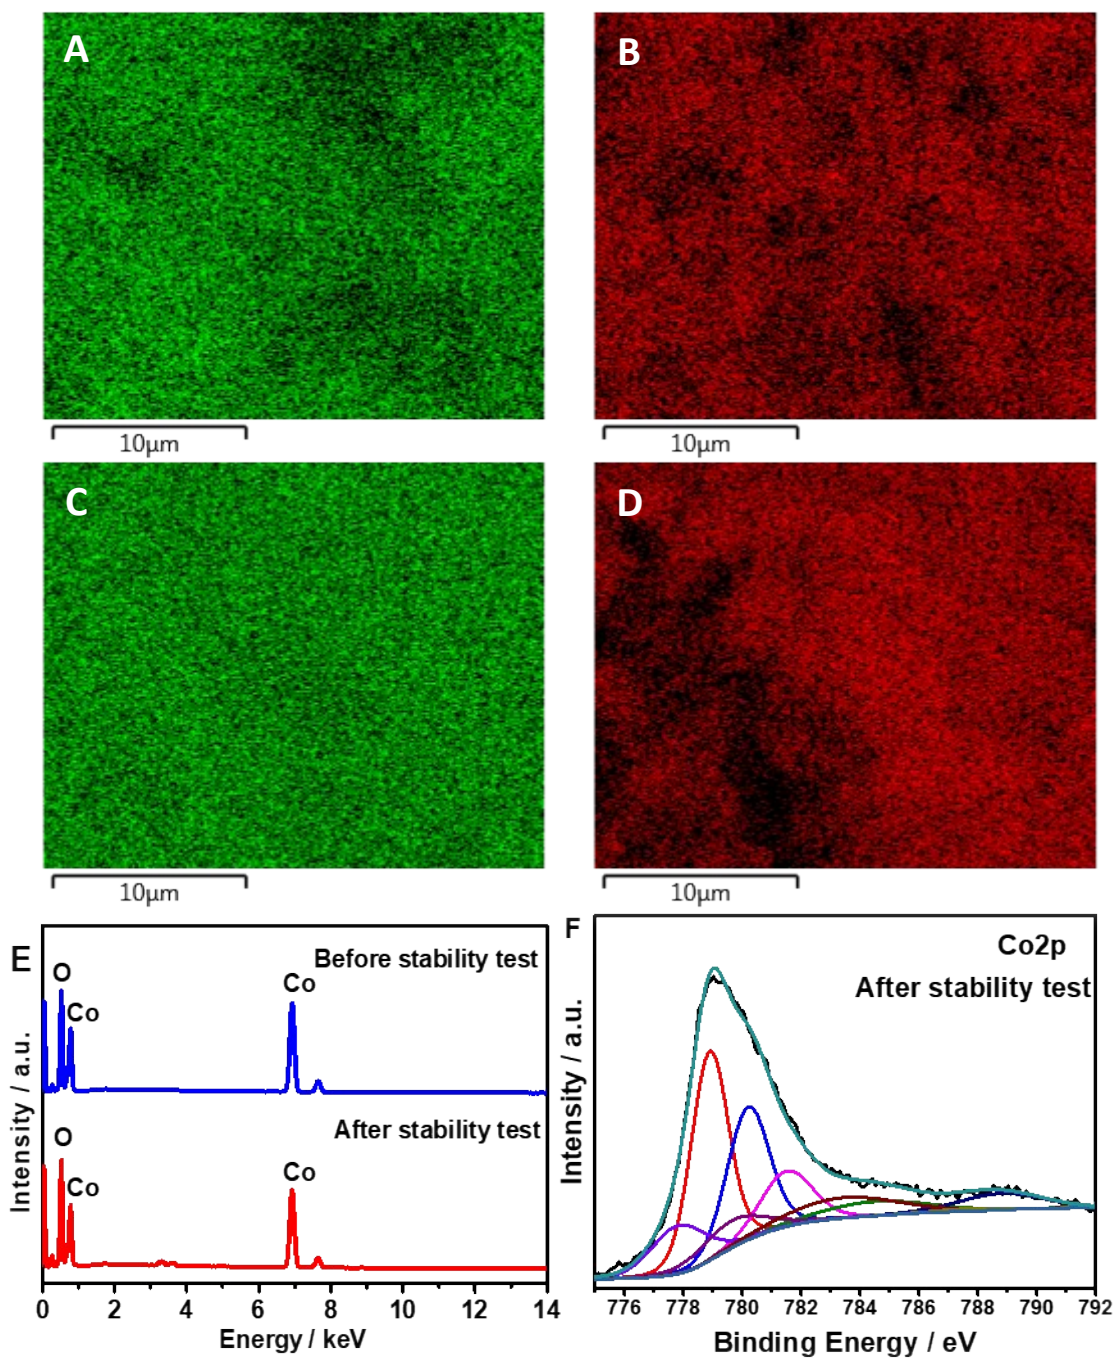

**Figure S8:** EDX maps of the samples etched for 17 h and annealed at 550 °C for the elements Co (A) and O (B) before stability test; EDX maps of the same after stability test for elements Co (C) and O (D); The EDX spectra before and after the stability test (E); The XPS Co2p spectra after the stability test (F).

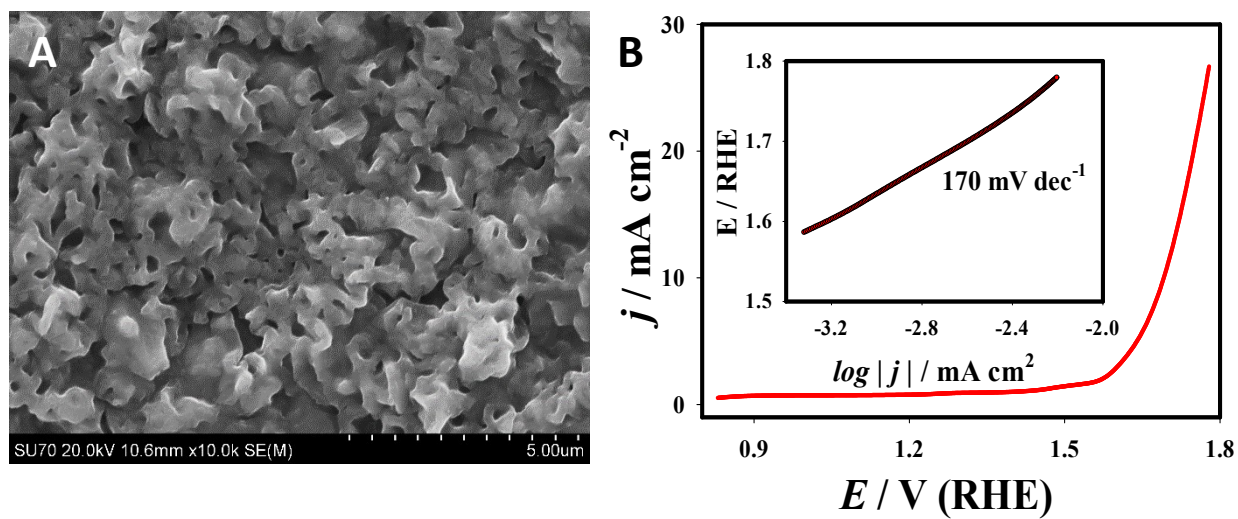

**Figure S9:** FE-SEM image of the Co substrate heated to 550 °C in air without treatment with nitric acid (A). LSV and Tafel plot (inset) of Co substrate directly annealed to 550 °C in air recorded in 1 M KOH (B).

**Table S1.** A list of dissolved mass of Co and corresponding morphological patterns of the Co substrate exposed in nitric acid.

| <b>Exposure Time (h)</b> | <b>Differences in Co substrate weights (mg)<sup>a</sup></b> | <b>ICP-AES Dissolved Co mass (mg)</b> | <b>Leaf Length (Approx.)</b> | <b>Leaf Thickness (Approx.)</b> | <b>Co:O Ratio (EDX)</b> |
|--------------------------|-------------------------------------------------------------|---------------------------------------|------------------------------|---------------------------------|-------------------------|
| 5                        | 53.8                                                        | 46.6                                  | 170 nm                       | 15.4 nm                         | 49.5: 50.5              |
| 10                       | 52.8                                                        | 55.8                                  | 230 nm                       | 16.2 nm                         | 36.7:63.3               |
| 17                       | 53.0                                                        | 56.0                                  | 230 nm                       | 15.8 nm                         | 27.4:72.5               |
| 25                       | 53.3                                                        | 53.5                                  | 350 nm                       | 16.2 nm                         | 26.5:73.5               |

<sup>a</sup> The differences in weights of Co substrates ( $\sim 0.63 \text{ cm}^2$ ) prior to and following the etching process.

**Table S2.** The morphological parameters of the developed  $\text{Co}_3\text{O}_4$  nanoflowers.

| <b>Annealing Temp<br/>(°C)</b> | <b>Flower Size<br/>(Approx.)</b> | <b>Leaf Length<br/>(Approx.)</b> | <b>Leaf Thickness<br/>(Approx.)</b> | <b>Co:O<br/>Ratio</b> |
|--------------------------------|----------------------------------|----------------------------------|-------------------------------------|-----------------------|
| 250 °C                         | 2.1 $\mu\text{m}$                | 384 nm                           | 6.9 nm                              | 39.8:60.2             |
| 350 °C                         | 2.2 $\mu\text{m}$                | 326 nm                           | 8.3 nm                              | 36.2:63.8             |
| 450 °C                         | 1.6 $\mu\text{m}$                | 312 nm                           | 9.3 nm                              | 31.1:68.9             |
| 550 °C                         | 2.1 $\mu\text{m}$                | 240 nm                           | 11.4 nm                             | 26.8:73.2             |

**Table S3.** Comparison of Co<sub>3</sub>O<sub>4</sub> nanoflowers formed at different annealed temperatures for the oxygen evolution reaction (OER) and other parameters.

| Annealing Temp (°C) | OER Onset (V) RHE | Tafel Slope (mV.dec <sup>-1</sup> ) | <i>j</i> at 1.69 V (mA.cm <sup>-2</sup> ) | C <sub>dl</sub> (mF.cm <sup>-2</sup> ) |
|---------------------|-------------------|-------------------------------------|-------------------------------------------|----------------------------------------|
| 250 °C              | 1.55              | 104                                 | 48                                        | 44.1                                   |
| 350 °C              | 1.58              | 94                                  | 29                                        | 4.0                                    |
| 450 °C              | 1.55              | 92                                  | 40                                        | 24.8                                   |
| 550 °C              | 1.52              | 80                                  | 60                                        | 72.4                                   |

**Table S4.** A comparative table on performance of catalyst for OER with reported literatures

| Catalyst                                                          | Electrolyte | Onset OER (V) (RHE) | $\eta$ at 10 mA cm <sup>-2</sup> (V) | Tafel Slope mV.dec <sup>-1</sup> | Working electrode substrate              | Loading mg cm <sup>-2</sup> | Reference |
|-------------------------------------------------------------------|-------------|---------------------|--------------------------------------|----------------------------------|------------------------------------------|-----------------------------|-----------|
| CoQDs/rGO                                                         | 0.1 M KOH   | 1.50                | 0.37                                 | 37.0                             | GCE                                      | ~0.008                      | S1        |
| CoP                                                               | 1.0 M KOH   | 1.56                | 0.49                                 | 59.0                             | GCE                                      | ~0.102                      | S2        |
| *Co-N-GCI                                                         | 0.1 KOH     | -                   | 0.43                                 | 69.0                             | GCE                                      | 0.5                         | S3        |
| NiCoFeO <sub>4</sub>                                              | 1.0 M KOH   | 1.50                | 0.38                                 | 50.5                             | Carbon paper                             | 2                           | S4        |
| NG-CoSe <sub>2</sub>                                              | 1.0 M KOH   | 1.52                | 0.36                                 | 40.0                             | GCE                                      | ~0.2                        | S5        |
| NiCoP/C                                                           | 1.0 M KOH   | 1.51                | 0.33                                 | 96.0                             | GCE                                      | -                           | S6        |
| ZnCo <sub>2</sub> O <sub>4</sub> / Co <sub>3</sub> O <sub>4</sub> | 1.0 M KOH   | 1.52                | 0.39                                 | 46.0                             | Pt electrode                             | -                           | S7        |
| Co <sub>3</sub> O <sub>4</sub> /NC-350                            | 1.0 M KOH   | 1.51                | 0.30                                 | 69.0                             | GCE                                      | -                           | S8        |
| CoO-L                                                             | 1.0 M KOH   | 1.59                | 0.37                                 | 46.0                             | Sustainable Coffee waste - hard template | 1                           | S9        |
| Co <sub>3</sub> O <sub>4</sub> /CoO                               | 1.0 M KOH   | 1.53                | 0.30                                 | 68.6                             | Ti Foil                                  | 0.14                        | S10       |
| Co <sub>3</sub> O <sub>4</sub> -NC/NGr-12 h                       | 1.0 M KOH   | 1.43                | 0.28                                 | 69.0                             | GCE                                      | 0.05                        | S11       |
| Co10-NS-C                                                         | 1.0 M KOH   | 1.58                | 0.27                                 | 67.0                             | Ni Foam                                  | -                           | S12       |
| Co <sub>3</sub> O <sub>4</sub> -24 h                              | 1.0 M KOH   | 1.45                | 0.30                                 | 67.7                             | Carbon paper                             | 0.8                         | S13       |
| Co <sub>3</sub> O <sub>4</sub> -550°C                             | 1.0 M KOH   | 1.52                | 0.34                                 | 80.0                             | Bulk Cobalt                              | NA                          | This work |

\*Co-N-GCI: cobalt and intercalated with conductive carbon nanospheres; NG: nitrogen doped graphene.

- S1. Govindhan, M.; Mao, B.; Chen, A.; Novel cobalt quantum dot/graphene nanocomposites as highly efficient electrocatalysts for water splitting, *Nanoscale*, **2016**, *8*, 1485-1492
- S2. Liu, M.; Li, J.; Cobalt Phosphide Hollow Polyhedron as Efficient Bifunctional Electrocatalysts for the Evolution Reaction of Hydrogen and Oxygen, *ACS Appl. Mater. Interfaces*, **2016**, *8*, 2158- 2165
- S3. Qiao, X.; Liao, S.; Zheng, R.; Deng, Y.; Song, H.; Du, L.; Cobalt and Nitrogen Codoped Graphene with Inserted Carbon Nanospheres as an Efficient Bifunctional Electrocatalyst for Oxygen Reduction and Evolution. *ACS Sustain. Chem. Eng.*, **2016**, *4*, 4131 –4136.

- S4. Maruthapandian, V.; Mathankumar, M.; Saraswathy, V.; Subramanian, B.; Muralidharan, S.; Study of the Oxygen Evolution Reaction Catalytic Behavior of  $\text{Co}_x\text{Ni}_{1-x}\text{Fe}_2\text{O}_4$  in Alkaline Medium, *ACS Appl. Mater. Interfaces* **2017**, *9*, 13132–13141.
- S5. Gao, M-R.; Cao, X.; Gao, Q.; Xu, Y-F.; Zheng, Y-R.; Jiang, J.; Yu, S-H.; Nitrogen-doped graphene supported  $\text{CoSe}_2$  nanobelt composite catalyst for efficient water oxidation, *ACS Nano*, **2014**, *8*, 3970-3978.
- S6. He, P.; Yu, X-Y.; Lou, X. W.; Carbon-Incorporated Nickel-Cobalt Mixed Metal Phosphide Nanoboxes with Enhanced Electrocatalytic Activity for Oxygen Evolution, *Angew. Chem. Int. Ed.* **2017**, *56*, 3897- 3900.
- S7. Kim, T. W.; Woo, M. A.; Regis, M.; Choi, K-S.; Electrochemical Synthesis of Spinel Type  $\text{ZnCo}_2\text{O}_4$  Electrodes for Use as Oxygen Evolution Reaction Catalysts, *J. Phys. Chem. Lett.* **2014**, *5*, 2370-2374.
- S8. Zhang, J.; Qian, B.; Sun, S.; Tao, S.; Chu, W.; Wu, D.; Song, L.; Ultrafine  $\text{Co}_3\text{O}_4$  Nanoparticles within Nitrogen-Doped Carbon Matrix Derived from Metal-Organic Complex for Boosting Lithium Storage and Oxygen Evolution Reaction, *Small*, **2019**, *15*, 1904260
- S9. Yu, M.; Waag, F.; Chan, C. K.; Weidenthaler, C.; Barcikowski, S.; Tuysuz, H.; Laser Fragmentation-Induced Defect-Rich Cobalt Oxide Nanoparticles for Electrochemical Oxygen Evolution Reaction, *ChemSusChem*, **2020**, *13*, 520-528.
- S10. Liu, Z.; Xiao, Z.; Luo, G.; Chen, R.; Dong, C-L.; Chen, X.; Cen, J.; Yang, H.; Wang, Y.; Su, D.; Li, Y.; Wang, S.; 2D Fe-doped NiO nanosheets with grain boundary defects for the advanced oxygen evolution reaction, *Small*, 2019, *15*, 1904903.
- S11. Singh, S. K.; Dhavale, V. M.; Kurungot, S.; Low Surface Energy Plane Exposed  $\text{Co}_3\text{O}_4$  Nanocubes Supported on Nitrogen-Doped Graphene as an Electrocatalyst for Efficient Water Oxidation, *ACS Appl. Mater. Interfaces*, **2015**, *7*, 1, 442–451.
- S12. Chaugule, A. A.; Mane, V. S.; Bandal, H. A.; Kim, H.; Kumbhar, A. S.; Ionic Liquid-Derived  $\text{Co}_3\text{O}_4$ -N/S-Doped Carbon Catalysts for the Enhanced Water Oxidation, *ACS Sustainable Chem. Eng.*, **2019**, *7*, 17, 14889–14898
- S13. Paul, B.; Bhanja, P.; Sharma, S.; Yamauchi, Y.; Alothman, Z. A.; Wang, Z-L.; Bal, R.; Bhaumik, A.; Morphologically controlled cobalt oxide nanoparticles for efficient oxygen evolution reaction, *J. Colloid Interface Sci.* **2021**, *582*, 322-332.
